# Supplementary material
Source: PubMed Central journal article supplement (PMC5010128)
Supplement: NIHMS69118-supplement-Supplementary_Material.pdf [file NIHMS69118-supplement-Supplementary_Material.pdf]

# **Precursory changes in seismic velocity for the spectrum of earthquake failure modes**

**Authors:** M.M. Scuderi<sup>1,2\*</sup>, C. Marone<sup>3</sup>, E. Tinti<sup>2</sup>, G. Di Stefano<sup>2</sup> and C. Collettini<sup>1,2</sup>

## **Affiliations:**

<sup>1</sup> *Dipartimento di Scienze della Terra, La Sapienza Università di Roma, Piazz. Aldo Moro 5, 00185 Rome Italy*

<sup>2</sup> *Istituto Nazionale di Geofisica e Vulcanologia (INGV), Via di Vigna Murata 605, 00143 Rome Italy*

<sup>3</sup> *Department of Geoscience, The Pennsylvania State University, University Park, PA 16802*

\*Correspondence to: [marco.scuderi@uniroma1.it](mailto:marco.scuderi@uniroma1.it)

## **Supplementary Material**

**Contains: Supplementary Figure 1, 2, 3, 4  
and Supplementary Table 1**

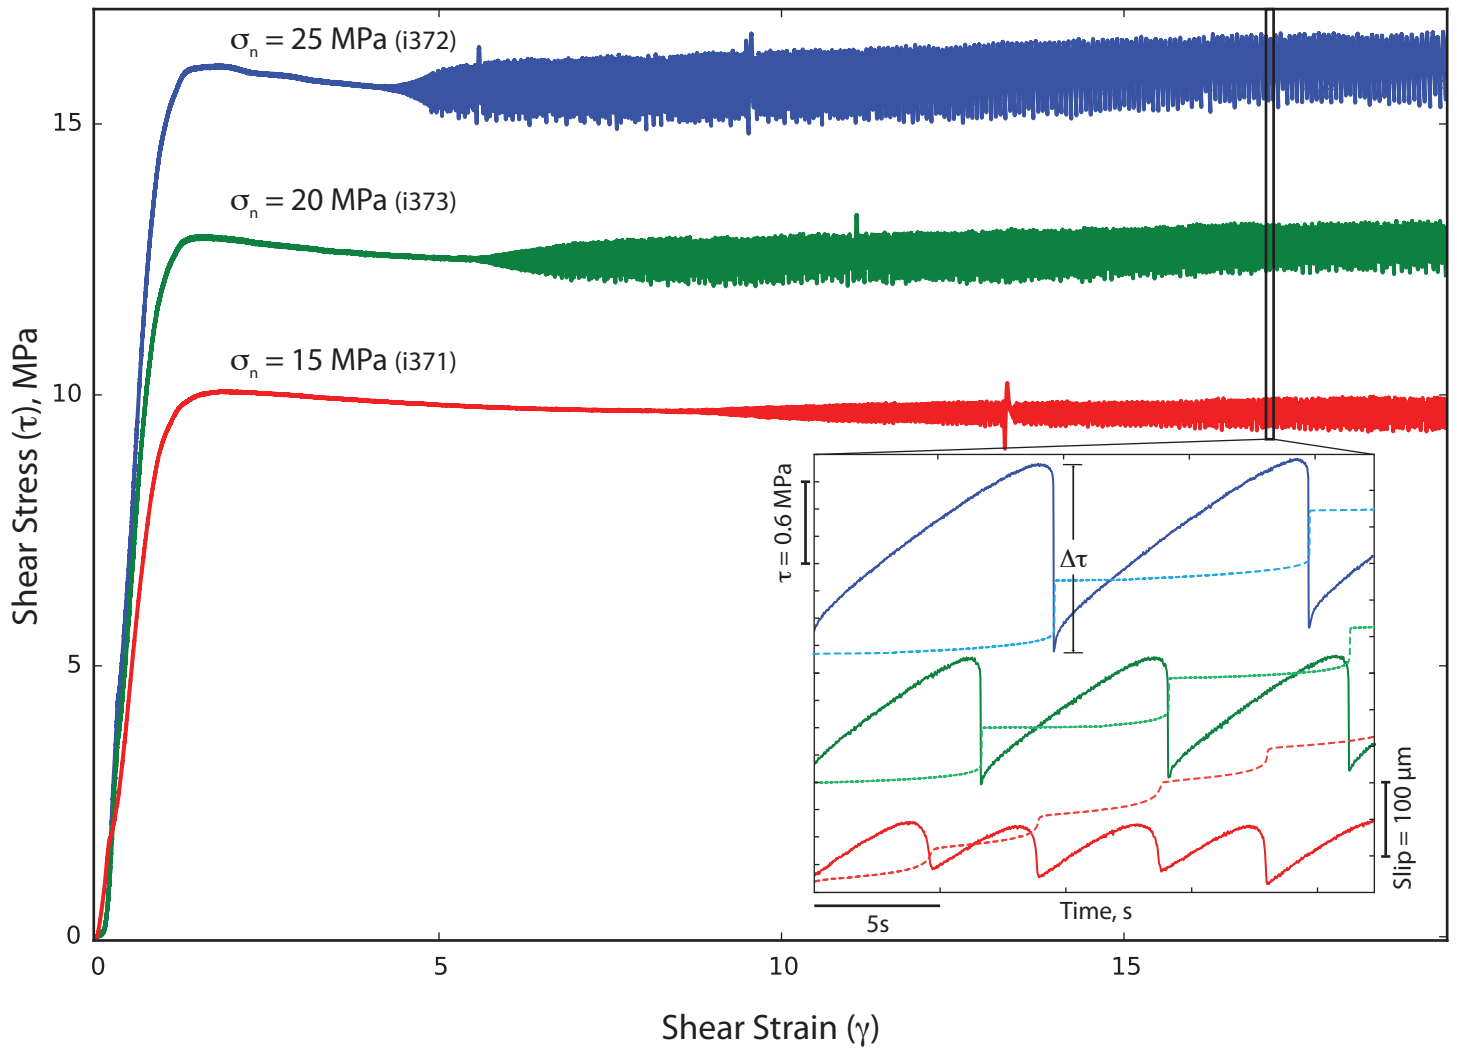

**Figure Supplementary 1.** Records of shear stress as a function of shear strain for representative experiments at three normal stresses,  $\sigma_n$ , and a constant shearing rate of  $10\mu\text{m/s}$ . In each case, shear is initially stable and transitions to unstable stick-slip spontaneously. Lower right inset shows detail of slip events (solid line is stress) and the corresponding fault slip (dashed lines) across the transition from slow to fast stick-slip.

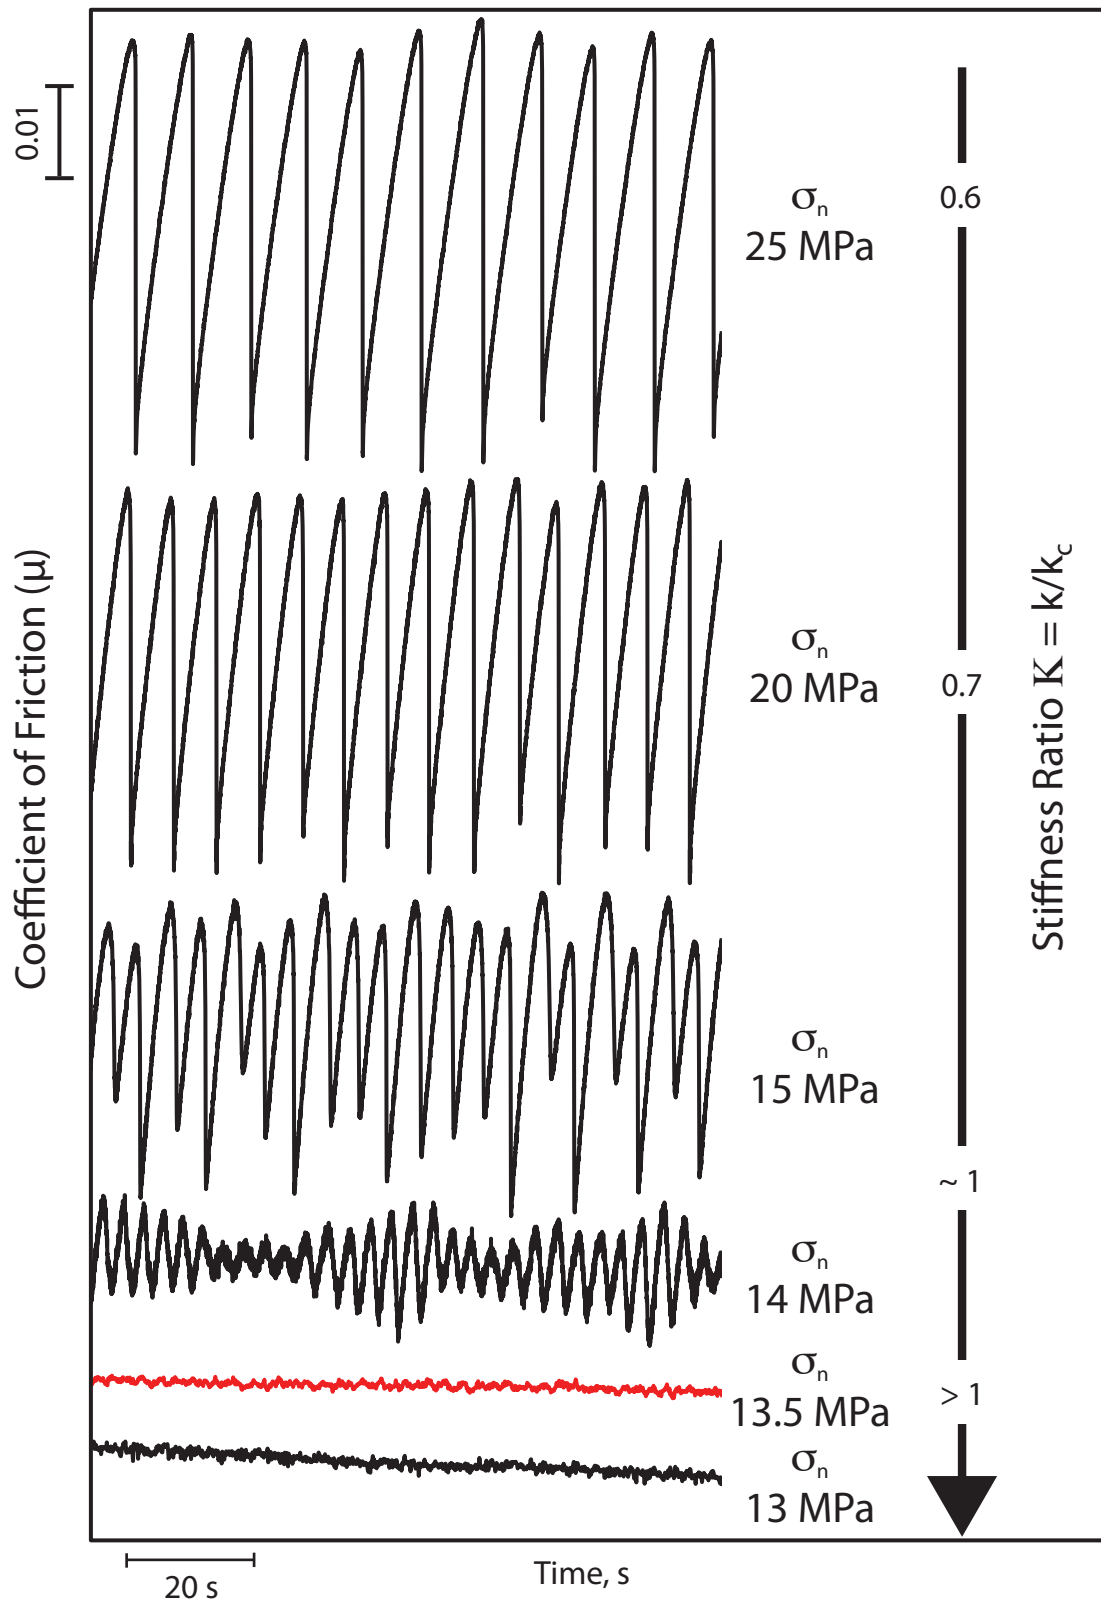

**Figure Supplementary 2.** Friction records for a series of experiments performed at different normal stresses to span the transition from fast stick-slip to stable sliding. As the stiffness ratio increases we document a net decrease in stress (friction) drop, an increase in stress drop duration and an increase in the frequency of the events. As the stability threshold is approached (i.e.  $K \sim 1$ ) period doubling ( $\sigma_n = 15$  MPa) and amplitude modulation of stress drop ( $\sigma_n = 14$  MPa) arise, reflecting chaotic behavior. When  $K > 1$  we observe stable shear. Note that the transition from fast stick-slip to steady sliding takes place in a very narrow range of normal stresses. All data are reported in terms of friction coefficient ( $\mu = \tau/\sigma_n$ ) and have been offset for clarity.

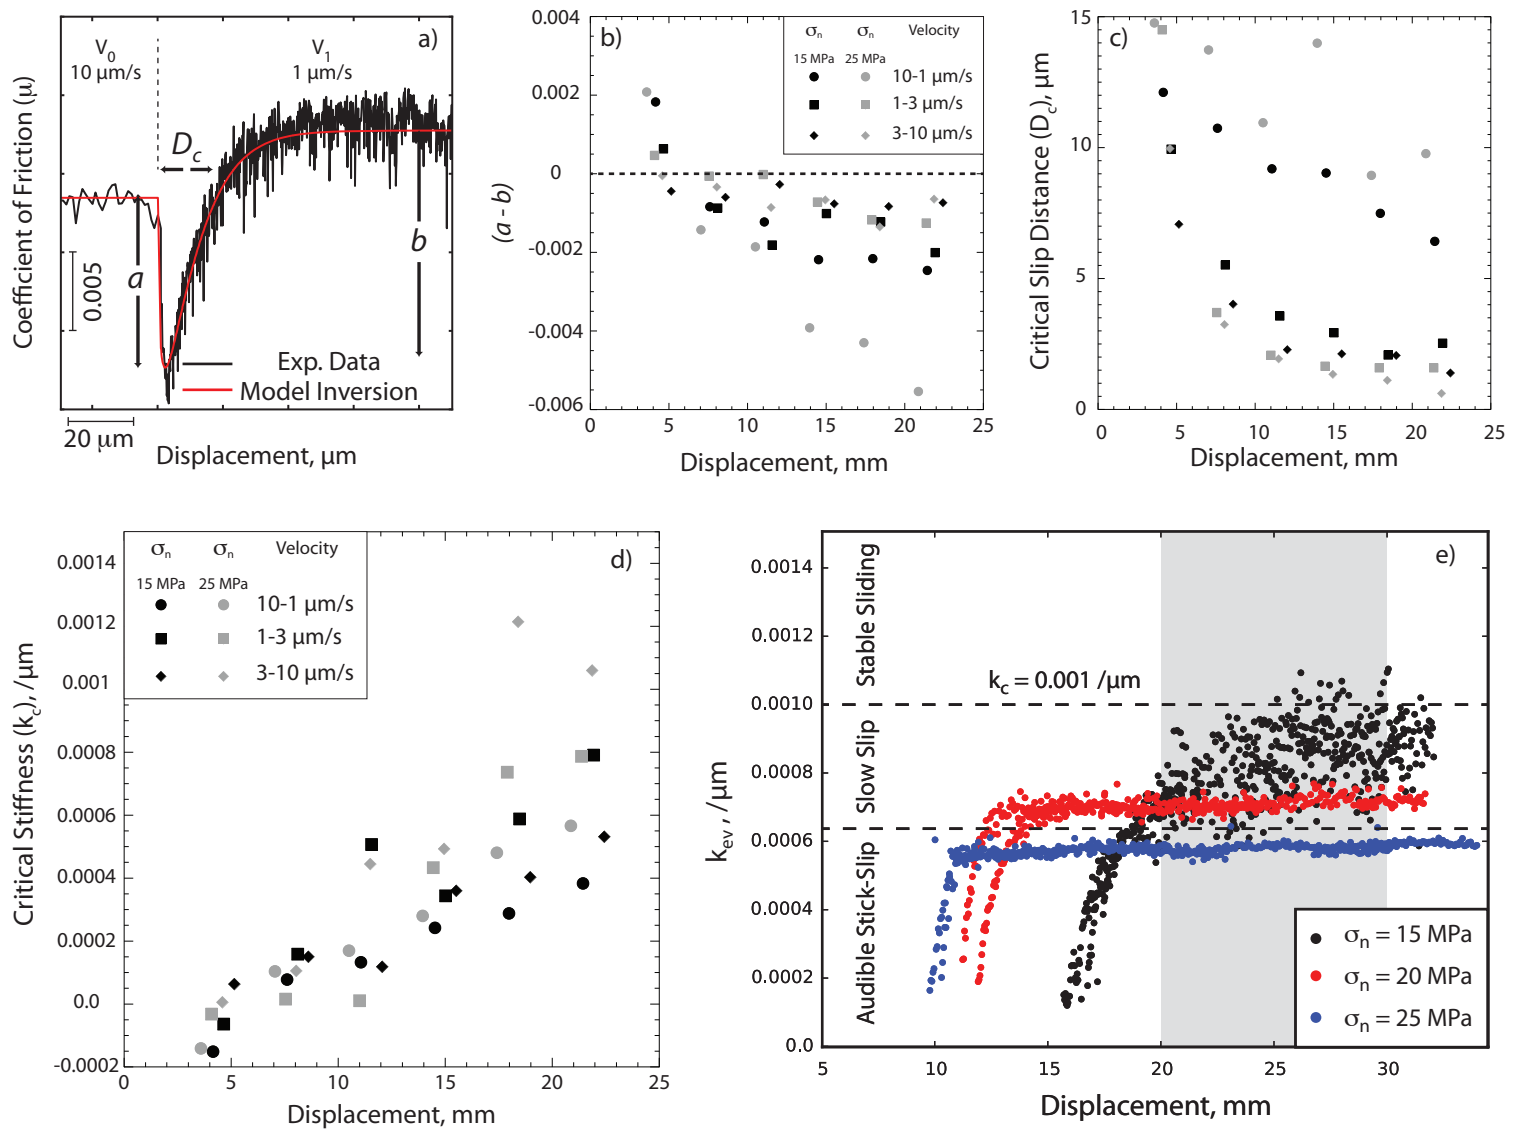

**Figure Supplementary 3.** Experimental data and modeling procedure used to obtain the rate- and state- friction parameters. (a) Representative data for a velocity step from 10 to 1  $\mu\text{m/s}$ . The evolution of frictional strength is shown as a function of shear displacement (black). Results of the model inversion are shown in red superimposed on the raw data. (b) The friction rate parameter ( $a-b$ ) shows a transition from velocity strengthening to velocity weakening as shear displacement increases. (c) The critical slip distance ( $D_c$ ) decreases with increasing displacement. (d) The resulting critical rheologic stiffness,  $k_c$ , increases as a function of displacement. (e) Evolution of the stiffness computed for each slip event ( $k$ ) in three experiments (Table Supplementary 1) as a function of shear displacement. Grey box indicate the interval of the data we used in Figure 1a, b.

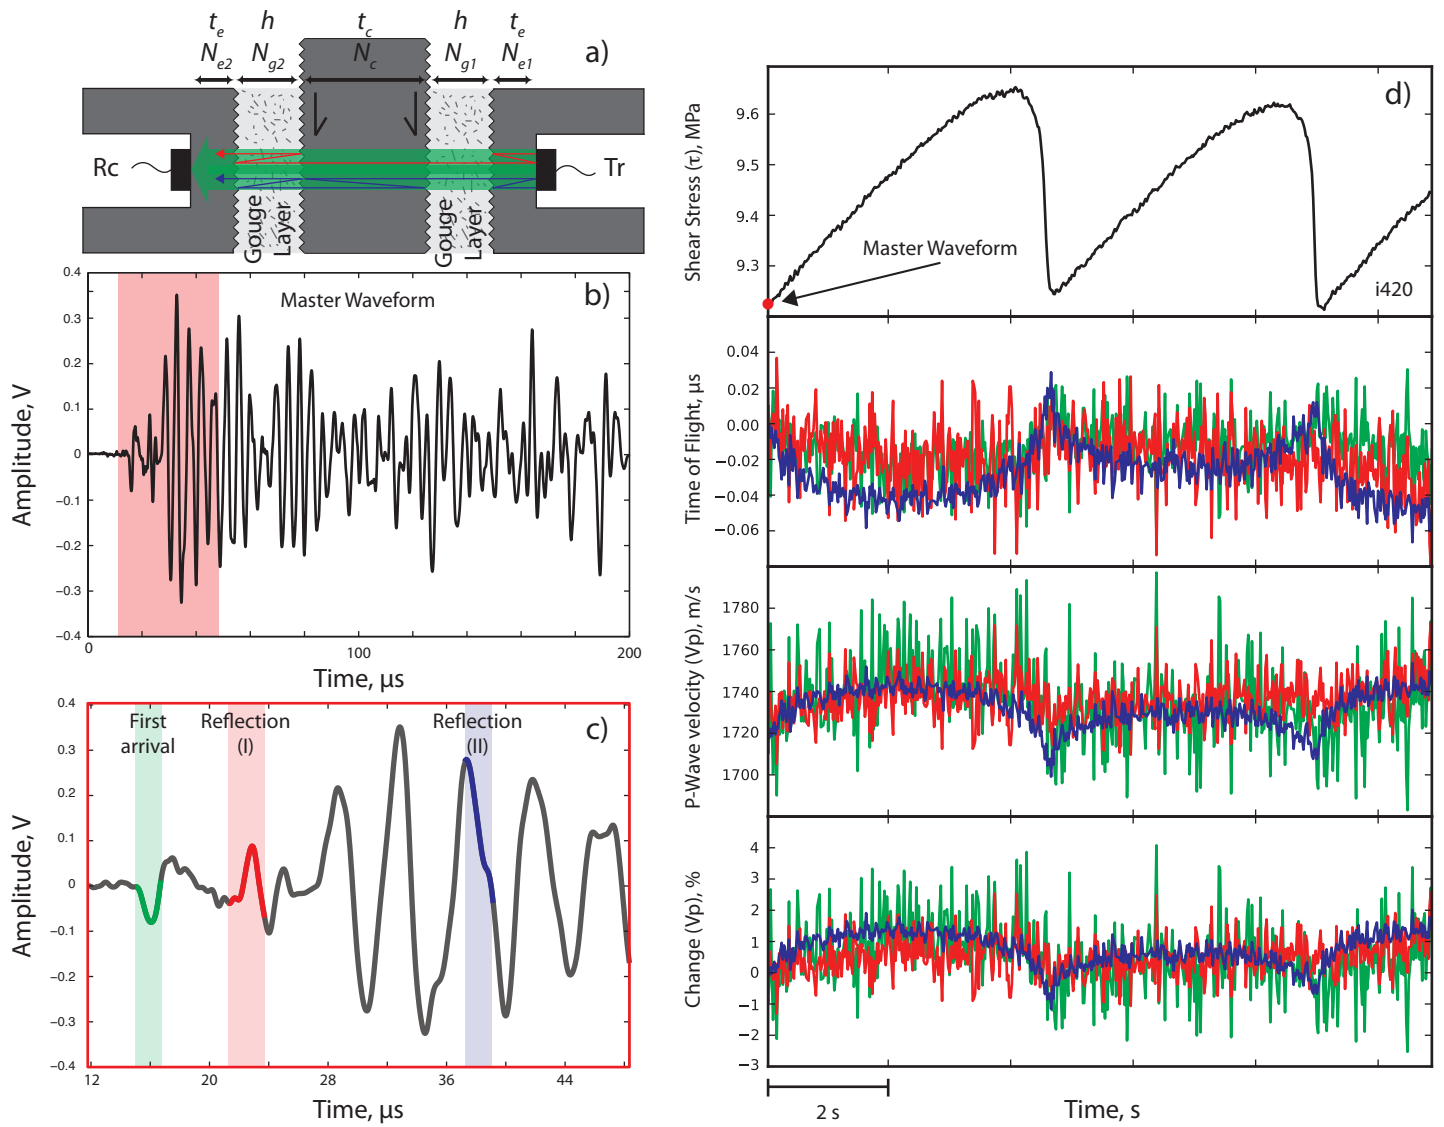

**Figure Supplementary 4.** (a) Schematic representation of the double direct shear configuration, showing the propagation model with elastic wave ray paths of the direct wave (green) and two reflected waveforms (red and blue). (b) Typical master waveform taken at the beginning of a slow slip event (red dot in panel d). (c) Zoom of the master waveform (red box in b) indicating the P-wave arrival and the P-wave coda. Two patterns corresponding to the reflections schemes indicated in (a) are shown. (d) Evolution of time of flight, P-wave velocity and change in P-wave velocity (%) for two slow slip events (upper panel), obtained from the cross-correlation of the P-wave arrival (green) and P-wave coda (red and blue).

| Experiment Number | Normal Stress (MPa) | Velocity ( $\mu\text{m/s}$ ) | Spring Constant (MPa/ $\mu\text{m}$ ) | RH (%) | Comments           |
|-------------------|---------------------|------------------------------|---------------------------------------|--------|--------------------|
| i416              | 15                  | Run in 10 v.steps<br>1-3-10  | NO                                    | 100    | Velocity Steps     |
| i433              | 25                  | Run in 10 v.steps<br>1-3-10  | NO                                    | 100    | Velocity Steps     |
| i266              | 13                  | 10                           | 0.0296264                             | 100    | Stable Sliding     |
| i268              | 13.5                | 10                           | 0.0296264                             | 100    | Stable Sliding     |
| i267              | 14                  | 10                           | 0.0296264                             | 100    | Slow-Slip          |
| i371              | 15                  | 10                           | 0.0296264                             | 100    | Slow-Slip          |
| i390              | 15                  | 10                           | 0.0296264                             | 100    | Slow-Slip          |
| i420              | 15                  | 10                           | 0.0296264                             | 100    | Slow-Slip          |
| i363              | 20                  | 10                           | 0.0296264                             | 100    | Intermediate       |
| i373              | 20                  | 10                           | 0.0296264                             | 100    | Intermediate       |
| i418              | 20                  | 10                           | 0.0296264                             | 100    | Intermediate       |
| i372              | 25                  | 10                           | 0.0296264                             | 100    | Audible Stick-Slip |
| i391              | 25                  | 10                           | 0.0296264                             | 100    | Audible Stick-Slip |
| i415              | 25                  | 10                           | 0.0296264                             | 100    | Audible Stick-Slip |
| i417              | 25                  | 10                           | 0.0296264                             | 100    | Audible Stick-Slip |
| i433              | 25                  | 10                           | 0.0296264                             | 100    | Audible Stick-Slip |

**Table Supplementary 1.** Summary of experiments and boundary conditions. All tests were conducted under 100% relative humidity (RH) to ensure experimental reproducibility.
